# Supplementary material for: A Generic Method for Fast and Sensitive Detection of Adeno-Associated Viruses Using Modified AAV Receptor Recombinant Proteins
Source: PubMed Central journal article supplement (PMC6864843; doi:10.3390/molecules24213973), 2019-11-03
Supplement: molecules-24-03973-s001.pdf [file molecules-24-03973-s001.pdf]

**Supplementary table S1:** Amino acid sequences of AAVR (PKD1-5) and SBP tag with the primers used for the construction of PET28a-AAVR-SBP-His plasmid

| Amino acid sequence |                                                                                                                                                                                                                                                                                                                                                                                                                                                                                                                                     |
|---------------------|-------------------------------------------------------------------------------------------------------------------------------------------------------------------------------------------------------------------------------------------------------------------------------------------------------------------------------------------------------------------------------------------------------------------------------------------------------------------------------------------------------------------------------------|
| AAVR<br>(PKD1-5)    | MSAGESVQITLPKNEVQLNAYVLQEPPKGETYTYDWQLITHPRD<br>YSGEMEGKHSQILKLSKLTPLGLYEFKVIVEGQNAHGEGYVNVTV<br>KPEPRKNRPPIAIVSPQFQEISLPTTSTVIDGSQSTDDDKIVQYHWE<br>ELKGPLREEKISEDTAILKLSKLVPGNYTFSLTVVDSGDATNSTTA<br>NLTVNKAVDYPPVANAGPNQVITLPQNSITLFGNQSTDDHGITSYE<br>WSLSPSSKGKVVEMQGVRTPTLQLSAMQEGDYTYQLTVTDTIGQ<br>QATAQVTVIVQPENNKPPQADAGPDKELTLPVDSTTLDGSKSSDD<br>QKIISYLWEKTQGPDGVQLENANSSVATVTGLQVGTYVFTLTVKD<br>ERNLQSQSSVNVIVKEEINKPPIAKITGNVVITLPTSTAELDGSKSS<br>DDKGIVSYLWTRDEGSPAAGEVLNHSDHHPILFLSNLVEGTYTFH<br>LKVTDAKGESDTRTTVEVKPD |
| SBP tag             | DEKTTGWRGGHVVEGLAGELEQLRARLEHHPQGQREP                                                                                                                                                                                                                                                                                                                                                                                                                                                                                               |
| Primer              |                                                                                                                                                                                                                                                                                                                                                                                                                                                                                                                                     |
| PKD1-5              | Forward: caaatgggtcgggatatgtctgctggagagagtg                                                                                                                                                                                                                                                                                                                                                                                                                                                                                         |
|                     | Reverse: gccggtggttttcatcatcaggttcacctcc                                                                                                                                                                                                                                                                                                                                                                                                                                                                                            |
| SBP tag             | Forward: tgtggagtgaaacctgatgatgaaaaaccacc                                                                                                                                                                                                                                                                                                                                                                                                                                                                                           |
|                     | Reverse: tgctcgagtgcggccggttcacgctggc                                                                                                                                                                                                                                                                                                                                                                                                                                                                                               |
